# Supplementary material for: Theoretical investigation on water adsorption conformations at aqueous anatase TiO2/water interfaces
Source: Royal Society of Chemistry journal article supplement (doi:10.1039/d2ta07994a), 2022-12-05
Supplement: d2ta07994a1.pdf [file d2ta07994a1.pdf]

## Theoretical investigation on the water adsorption conformations at the aqueous anatase TiO<sub>2</sub>/water interfaces

Jie-Qiong Li,<sup>a,b</sup> Yan Sun,<sup>b</sup> Jun Cheng<sup>b\*</sup>

<sup>a</sup>State Henan Engineering Center of New Energy Battery Materials, Henan D&A Engineering Center of Advanced Battery Materials, College of Chemistry and Chemical Engineering, Shangqiu Normal University, Shangqiu 476000, China

<sup>b</sup>State Key Laboratory of Physical Chemistry of Solid Surfaces, *i*ChEM, College of Chemistry and Chemical Engineering, Xiamen University, Xiamen 361005, China

\*Corresponding authors. E-mail: [chengjun@xmu.edu.cn](mailto:chengjun@xmu.edu.cn) (J. Cheng)

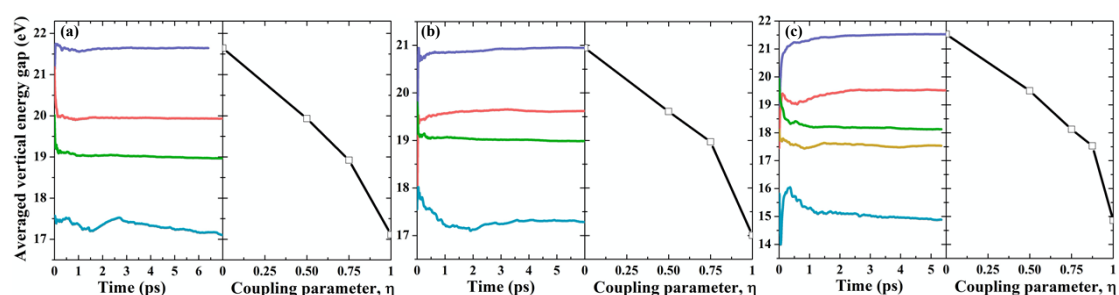

**Fig. S1** Time accumulative averages of vertical energy gaps against the coupling parameters for the deprotonation reactions of the aqueous anatase (101) surface: (a) the deprotonation of TiOH<sub>2</sub>; (b) the deprotonation of Ti<sub>2</sub>OH<sup>+</sup>; (c) the deprotonation of H<sub>3</sub>O<sup>+</sup> at (101)/water interface.

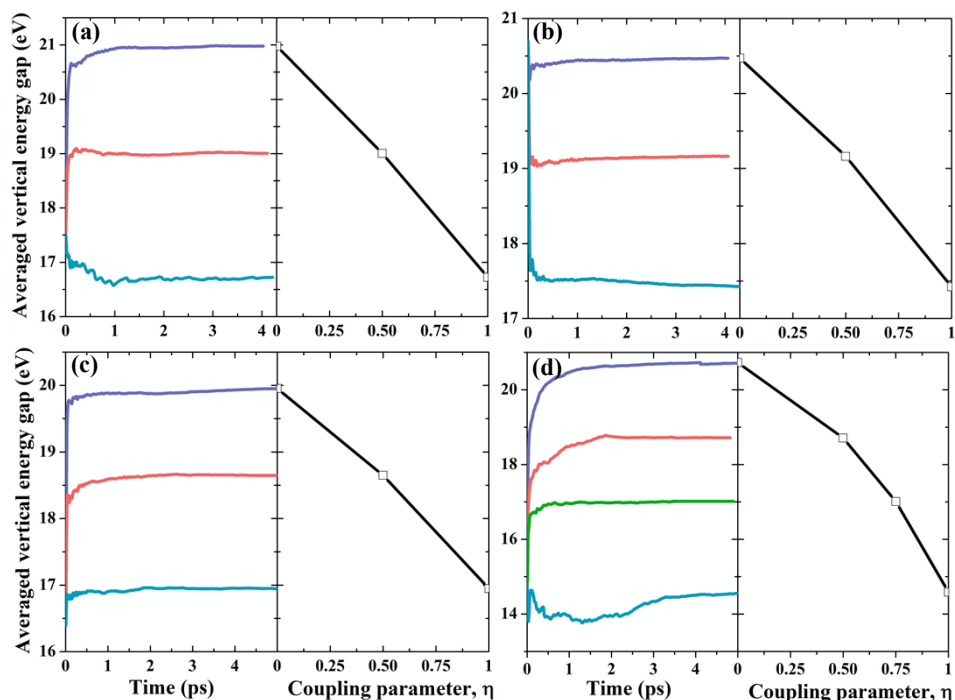

**Fig. S2** Time accumulative averages of vertical energy gaps against the coupling parameters for the deprotonation reactions of the aqueous anatase (001) surface: (a) the deprotonation of  $\text{TiOH}_2$ ; (b) the deprotonation of  $\text{Ti}_2\text{OH}^+$  for  $\text{O}_A$  site; (c) the deprotonation of  $\text{Ti}_2\text{OH}^+$  for  $\text{O}_B$  site; (d) the deprotonation of  $\text{H}_3\text{O}^+$  at (001)/water interface.

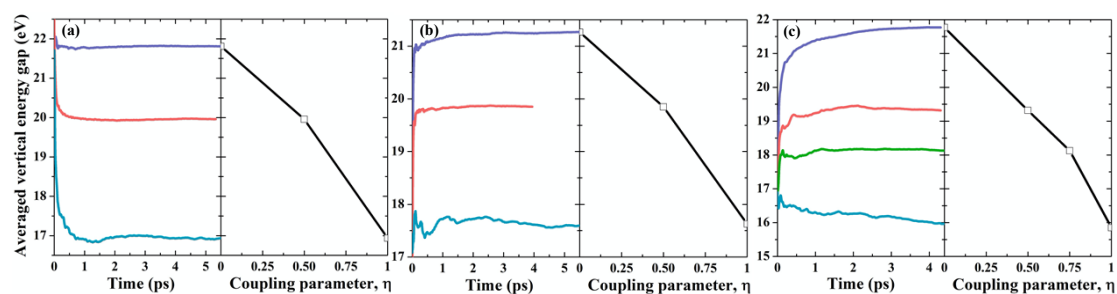

**Fig. S3** Time accumulative averages of vertical energy gaps against the coupling parameters for the deprotonation reactions of the aqueous anatase (100) surface: (a) the deprotonation of  $\text{TiOH}_2$ ; (b) the deprotonation of  $\text{Ti}_2\text{OH}^+$ ; (c) the deprotonation of  $\text{H}_3\text{O}^+$  at (100)/water interface.

**Table S1** The average electrostatic potentials of solid phase ( $V_{solid}$ , eV), vacuum phase ( $V_{vac}$ , eV) and the electrostatic potential difference ( $\Delta V$ , eV) for anatase (101) surface.

| Layer | $V_{solid}$ | $V_{vac}$ | $\Delta V$ |
|-------|-------------|-----------|------------|
| 3L    | -7.16       | 5.62      | 12.78      |
| 4L    | -6.38       | 6.56      | 12.94      |
| 5L    | -5.68       | 7.24      | 12.92      |
| 6L    | -5.10       | 7.83      | 12.93      |

**Table S2** The average electrostatic potentials of solid phase ( $V_{solid}$ , eV), vacuum phase ( $V_{vac}$ , eV) and the electrostatic potential difference ( $\Delta V$ , eV) for anatase (001) surface.

| Layer | $V_{solid}$ | $V_{vac}$ | $\Delta V$ |
|-------|-------------|-----------|------------|
| 3L    | -8.51       | 3.77      | 12.28      |
| 4L    | -8.84       | 3.51      | 12.35      |
| 5L    | -7.93       | 4.55      | 12.48      |
| 6L    | -7.09       | 5.40      | 12.49      |
| 7L    | -6.60       | 5.87      | 12.47      |

**Table S3** The average electrostatic potentials of solid phase ( $V_{solid}$ , eV), vacuum phase ( $V_{vac}$ , eV) and the electrostatic potential difference ( $\Delta V$ , eV) for anatase (100) surface.

| Layer | $V_{solid}$ | $V_{vac}$ | $\Delta V$ |
|-------|-------------|-----------|------------|
| 3L    | -7.49       | 5.09      | 12.63      |
| 4L    | -7.50       | 4.79      | 12.29      |
| 5L    | -7.01       | 5.42      | 12.43      |
| 6L    | -6.65       | 5.84      | 12.49      |
| 7L    | -6.20       | 6.32      | 12.52      |
| 8L    | -5.84       | 6.67      | 12.51      |
| 9L    | -5.51       | 7.01      | 12.52      |
